# Supplementary material for: Enacting national social distancing policies corresponds with dramatic reduction in COVID19 infection rates
Source: PubMed Central journal article supplement (PMC7392246; doi:10.1371/journal.pone.0236619), 2020-07-30
Supplement: pone.0236619.s004.pdf [file pone.0236619.s004.pdf]

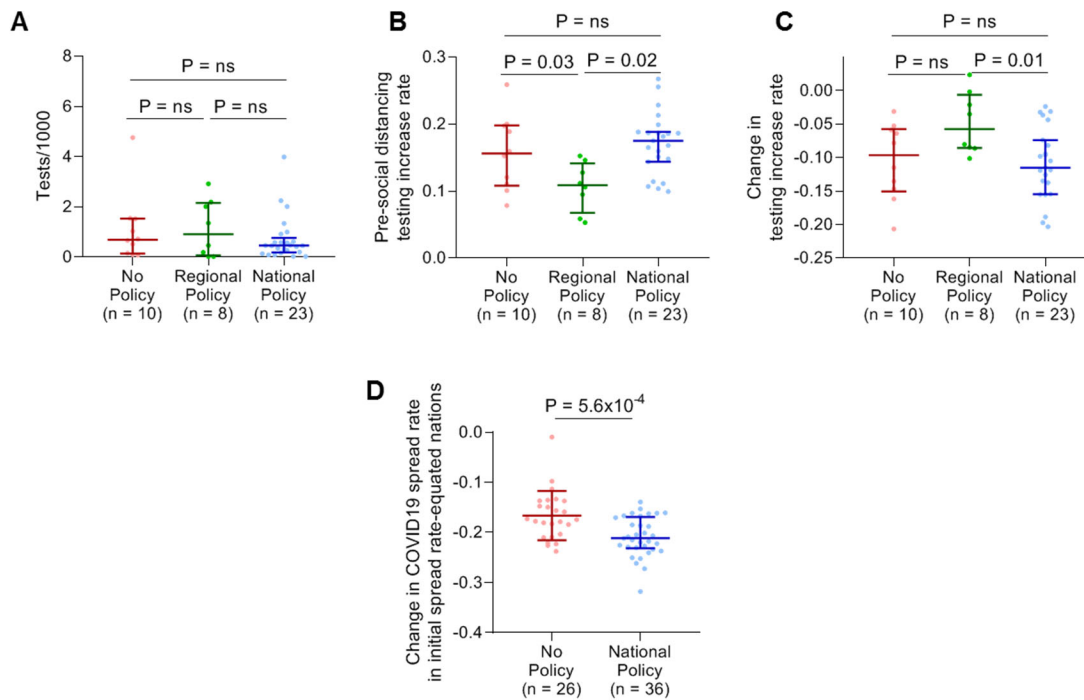

**Figure S3. Testing rates are not altered between countries with social distancing policies and no policy. (A)** Tests per thousand inhabitants during initial time period before implantation of social distancing policies. **(B)** Rate at which countries increased testing capacity, fit as  $Tests \sim Tests_0 \cdot \exp(k_{testing} \cdot t)$ . **(C)** Difference in testing rate before and after implementation of social distancing policies. All data shown as median with interquartile range, Kruskal-Wallis with Dunn's posthoc test. **(D)** Change in COVID19 spread rate following social distancing policy implementation (or matched time period) in countries with equated initial COVID19 spread rates.
